# Supplementary material
Source: PubMed Central journal article supplement (PMC10795675)
Supplement: ehp13380.s001.acco.pdf [file ehp13380.s001.acco.pdf]

**Note to readers with disabilities:** *EHP* strives to ensure that all journal content is accessible to all readers. However, some figures and Supplemental Material published in *EHP* articles may not conform to [508 standards](#) due to the complexity of the information being presented. If you need assistance accessing journal content, please contact [ehp508@niehs.nih.gov](mailto:ehp508@niehs.nih.gov). Our staff will work with you to assess and meet your accessibility needs within 3 working days.

### **Supplemental Material**

#### **Lung Cancer Risks Associated with Occupational Exposure to Pairs of Five Lung Carcinogens: Results from a Pooled Analysis of Case-Control Studies (SYNERGY)**

Ann Olsson, Liacine Bouaoun, Joachim Schüz, Roel Vermeulen, Thomas Behrens, Calvin Ge, Hans Kromhout, Jack Siemiatycki, Per Gustavsson, Paolo Boffetta, Benjamin Kendzia, Loredana Radoi, Christine Barul, Stefan Karrasch, Heinz-Erich Wichmann, Dario Consonni, Maria Teresa Landi, Neil E. Caporaso, Franco Merletti, Enrica Migliore, Lorenzo Richiardi, Karl-Heinz Jöckel, Wolfgang Ahrens, Hermann Pohlabein, Guillermo Fernández-Tardón, David Zaridze, John K. Field, Jolanta Lissowska, Beata Świątkowska, John R. McLaughlin, Paul A. Demers, Miriam Schejbalova, Lenka Foretova, Vladimir Janout, Tamás Pándics, Eleonora Fabianova, Dana Mates, Francesco Forastiere, Kurt Straif, Thomas Brüning, Jelle Vlaanderen, and Susan Peters

#### **Table of Contents**

**Table S1.** Pairwise interactions between five occupational lung carcinogens (asbestos, chromium-VI, nickel, PAH, and silica) in relation to lung cancer risk overall and for major lung cancer subtypes in male workers in SYNERGY pooled analyses.

**Table S2.** Pairwise interactions between five occupational lung carcinogens (asbestos, chromium VI, nickel, PAH, and silica) in relation to lung cancer risk overall and for major lung cancer subtypes in female workers in SYNERGY pooled analyses.

**Table S3.** Risk of lung cancer (OR), relative excess risk due to interaction (RERI), and test for multiplicative interaction (P-value) associated with single and pairwise combinations of occupational exposure to asbestos, chromium VI, nickel, PAH, and silica in male workers in SYNERGY by smoking status (never, former, and current cigarette smokers).

**Figure S1.** Heatmaps of Cramer's V statistics (Corr) between the never/ever occupational exposures by lag time in years.



|                                                         |       |      |                      |      |                     |      |                      |      |                     |
|---------------------------------------------------------|-------|------|----------------------|------|---------------------|------|----------------------|------|---------------------|
| Asbestos & silica                                       |       |      |                      |      |                     |      |                      |      |                     |
| Never exposed to both                                   | 7971  | 5050 | 1 [Reference]        | 1383 | 1 [Reference]       | 1972 | 1 [Reference]        | 789  | 1 [Reference]       |
| Never exposed to asbestos and ever exposed to silica    | 1678  | 1597 | 1.35 (1.23, 1.47)    | 365  | 1.20 (1.03, 1.37)   | 711  | 1.48 (1.31, 1.65)    | 282  | 1.44 (1.21, 1.67)   |
| Ever exposed to asbestos and never exposed to silica    | 4340  | 3906 | 1.27 (1.19, 1.35)    | 982  | 1.20 (1.08, 1.31)   | 1665 | 1.33 (1.21, 1.44)    | 602  | 1.23 (1.08, 1.38)   |
| Ever exposed to both                                    | 2462  | 3052 | 1.57 (1.45, 1.69)    | 595  | 1.26 (1.11, 1.41)   | 1480 | 1.80 (1.63, 1.97)    | 527  | 1.61 (1.39, 1.83)   |
| <i>p-value multiplicative interaction</i>               |       |      | 0.14                 |      | 0.16                |      | 0.24                 |      | 0.40                |
| RERI                                                    |       |      | -0.05 (-0.21, 0.11)  |      | -0.14 (-0.36, 0.08) |      | -0.01 (-0.23, 0.21)  |      | -0.06 (-0.35, 0.24) |
| Chromium-VI & PAH                                       |       |      |                      |      |                     |      |                      |      |                     |
| Never exposed to both                                   | 10794 | 7785 | 1 [Reference]        | 2028 | 1 [Reference]       | 3207 | 1 [Reference]        | 1231 | 1 [Reference]       |
| Never exposed to chromium-VI and ever exposed to PAH    | 1837  | 1689 | 1.09 (1.00, 1.18)    | 401  | 1.01 (0.88, 1.14)   | 738  | 1.16 (1.03, 1.28)    | 268  | 1.12 (0.94, 1.29)   |
| Ever exposed to chromium-VI and never exposed to PAH    | 1580  | 1799 | 1.35 (1.23, 1.46)    | 401  | 1.20 (1.04, 1.35)   | 797  | 1.44 (1.29, 1.59)    | 328  | 1.45 (1.24, 1.67)   |
| Ever exposed to both                                    | 2240  | 2332 | 1.23 (1.13, 1.32)    | 495  | 1.08 (0.95, 1.21)   | 1086 | 1.33 (1.21, 1.46)    | 373  | 1.32 (1.14, 1.5)    |
| <i>p-value multiplicative interaction</i>               |       |      | 0.01                 |      | 0.30                |      | 0.01                 |      | 0.09                |
| RERI                                                    |       |      | -0.21 (-0.37, -0.05) |      | -0.12 (-0.35, 0.1)  |      | -0.27 (-0.48, -0.05) |      | -0.25 (-0.55, 0.06) |
| Chromium-VI & silica                                    |       |      |                      |      |                     |      |                      |      |                     |
| Never exposed to both                                   | 10081 | 6932 | 1 [Reference]        | 1908 | 1 [Reference]       | 2732 | 1 [Reference]        | 1083 | 1 [Reference]       |
| Never exposed to chromium-VI and ever exposed to silica | 2550  | 2542 | 1.28 (1.19, 1.38)    | 521  | 1.05 (0.93, 1.17)   | 1213 | 1.44 (1.3, 1.57)     | 416  | 1.28 (1.1, 1.45)    |
| Ever exposed to chromium-VI and never exposed to silica | 2230  | 2024 | 1.17 (1.08, 1.27)    | 457  | 1.02 (0.90, 1.14)   | 905  | 1.27 (1.14, 1.39)    | 308  | 1.19 (1.01, 1.36)   |
| Ever exposed to both                                    | 1590  | 2107 | 1.55 (1.42, 1.68)    | 439  | 1.31 (1.14, 1.48)   | 978  | 1.75 (1.57, 1.93)    | 393  | 1.74 (1.49, 2.00)   |
| <i>p-value multiplicative interaction</i>               |       |      | 0.67                 |      | 0.05                |      | 0.64                 |      | 0.23                |
| RERI                                                    |       |      | 0.09 (-0.07, 0.26)   |      | 0.24 (0.02, 0.46)   |      | 0.05 (-0.18, 0.28)   |      | 0.28 (-0.03, 0.59)  |
| Nickel & PAH                                            |       |      |                      |      |                     |      |                      |      |                     |
| Never exposed to both                                   | 11383 | 8551 | 1 [Reference]        | 2188 | 1 [Reference]       | 3546 | 1 [Reference]        | 1397 | 1 [Reference]       |
| Never exposed to nickel and ever exposed to PAH         | 1928  | 1838 | 1.10 (1.01, 1.19)    | 434  | 1.02 (0.89, 1.14)   | 801  | 1.15 (1.04, 1.27)    | 293  | 1.10 (0.94, 1.26)   |
| Ever exposed to nickel and never exposed to PAH         | 991   | 1033 | 1.26 (1.13, 1.39)    | 241  | 1.17 (0.98, 1.36)   | 458  | 1.31 (1.14, 1.49)    | 162  | 1.17 (0.94, 1.39)   |

|                                                    |       |      |                      |      |                     |      |                     |      |                     |
|----------------------------------------------------|-------|------|----------------------|------|---------------------|------|---------------------|------|---------------------|
| Ever exposed to both                               | 2149  | 2183 | 1.17 (1.08, 1.26)    | 462  | 1.05 (0.92, 1.17)   | 1023 | 1.26 (1.14, 1.38)   | 348  | 1.22 (1.05, 1.39)   |
| <i>p-value multiplicative interaction</i>          |       |      | 0.02                 |      | 0.27                |      | 0.05                |      | 0.72                |
| RERI                                               |       |      | -0.19 (-0.36, -0.01) |      | -0.14 (-0.39, 0.11) |      | -0.20 (-0.43, 0.03) |      | -0.04 (-0.35, 0.26) |
|                                                    |       |      |                      |      |                     |      |                     |      |                     |
| Nickel & silica                                    |       |      |                      |      |                     |      |                     |      |                     |
| Never exposed to both                              | 10107 | 6972 | 1 [Reference]        | 1917 | 1 [Reference]       | 2749 | 1 [Reference]       | 1086 | 1 [Reference]       |
| Never exposed to nickel and ever exposed to silica | 3204  | 3417 | 1.34 (1.25, 1.43)    | 705  | 1.10 (0.98, 1.21)   | 1598 | 1.5 (1.37, 1.63)    | 604  | 1.43 (1.26, 1.6)    |
| Ever exposed to nickel and never exposed to silica | 2204  | 1984 | 1.17 (1.07, 1.26)    | 448  | 1.01 (0.89, 1.14)   | 888  | 1.26 (1.13, 1.38)   | 305  | 1.20 (1.02, 1.37)   |
| Ever exposed to both                               | 936   | 1232 | 1.55 (1.39, 1.71)    | 255  | 1.34 (1.12, 1.56)   | 593  | 1.75 (1.53, 1.97)   | 205  | 1.61 (1.32, 1.91)   |
| <i>p-value multiplicative interaction</i>          |       |      | 0.97                 |      | 0.09                |      | 0.37                |      | 0.65                |
| RERI                                               |       |      | 0.05 (-0.14, 0.24)   |      | 0.23 (-0.02, 0.48)  |      | -0.01 (-0.27, 0.25) |      | -0.01 (-0.36, 0.34) |
|                                                    |       |      |                      |      |                     |      |                     |      |                     |
| PAH & silica                                       |       |      |                      |      |                     |      |                     |      |                     |
| Never exposed to both                              | 9468  | 6455 | 1 [Reference]        | 1772 | 1 [Reference]       | 2546 | 1 [Reference]       | 1012 | 1 [Reference]       |
| Never exposed to PAH and ever exposed to silica    | 2906  | 3129 | 1.36 (1.26, 1.45)    | 657  | 1.13 (1.00, 1.25)   | 1458 | 1.53 (1.39, 1.67)   | 547  | 1.44 (1.26, 1.62)   |
| Ever exposed to PAH and never exposed to silica    | 2843  | 2501 | 1.11 (1.03, 1.19)    | 593  | 0.99 (0.88, 1.10)   | 1091 | 1.21 (1.09, 1.32)   | 379  | 1.16 (1.00, 1.31)   |
| Ever exposed to both                               | 1234  | 1520 | 1.44 (1.30, 1.57)    | 303  | 1.19 (1.02, 1.37)   | 733  | 1.64 (1.45, 1.83)   | 262  | 1.54 (1.28, 1.8)    |
| <i>p-value multiplicative interaction</i>          |       |      | 0.46                 |      | 0.49                |      | 0.14                |      | 0.50                |
| RERI                                               |       |      | -0.03 (-0.19, 0.14)  |      | 0.08 (-0.14, 0.3)   |      | -0.1 (-0.33, 0.13)  |      | -0.05 (-0.37, 0.26) |

ORs were adjusted for study centre, age group (category), smoking pack-years (current and former smokers: <10, 10-19, and ≥ 20 pack-years, never-smokers) and time since quitting smoking (current smokers; former smokers: <7, 8–15, 16–25, and ≥ 26 years; never-smokers).

Table S2. Pairwise interactions between five occupational lung carcinogens (asbestos, chromium VI, nickel, PAH, and silica) in relation to lung cancer risk overall and for major lung cancer subtypes in female workers in SYNERGY pooled analyses

| <b>WOMEN</b>                                              | Lung cancer        |                 |                    | Adenocarcinoma  |                     | Squamous cell cancers |                     | Small cell lung cancer |                     |
|-----------------------------------------------------------|--------------------|-----------------|--------------------|-----------------|---------------------|-----------------------|---------------------|------------------------|---------------------|
|                                                           | Controls<br>N=4514 | Cases<br>N=3296 | OR (95% CI)        | Cases<br>N=1427 | OR (95% CI)         | Cases<br>N=675        | OR (95% CI)         | Cases<br>N=530         | OR (95% CI)         |
| <b>Asbestos &amp; chromium-VI</b>                         |                    |                 |                    |                 |                     |                       |                     |                        |                     |
| Never exposed to both                                     | 3915               | 2726            | 1 [Reference]      | 1216            | 1 [Reference]       | 539                   | 1 [Reference]       | 416                    | 1 [Reference]       |
| Never exposed to asbestos and ever exposed to chromium-VI | 89                 | 88              | 1.15 (0.75, 1.54)  | 33              | 1.08 (0.60, 1.55)   | 19                    | 1.11 (0.45, 1.77)   | 20                     | 1.96 (0.73, 3.2)    |
| Ever exposed to asbestos and never exposed to chromium-VI | 453                | 411             | 1.11 (0.93, 1.3)   | 156             | 0.99 (0.78, 1.2)    | 100                   | 1.26 (0.90, 1.61)   | 77                     | 1.37 (0.92, 1.82)   |
| Ever exposed to both                                      | 57                 | 71              | 1.32 (0.79, 1.85)  | 22              | 0.93 (0.43, 1.43)   | 17                    | 1.10 (0.39, 1.82)   | 17                     | 2.99 (0.94, 5.03)   |
| <i>p-value multiplicative interaction</i>                 |                    |                 | 0.89               |                 | 0.71                |                       | 0.61                |                        | 0.84                |
| RERI                                                      |                    |                 | 0.06 (-0.61, 0.74) |                 | -0.14 (-0.85, 0.57) |                       | -0.26 (-1.27, 0.75) |                        | 0.65 (-1.72, 3.01)  |
| <b>Asbestos &amp; nickel</b>                              |                    |                 |                    |                 |                     |                       |                     |                        |                     |
| Never exposed to both                                     | 3923               | 2730            | 1 [Reference]      | 1218            | 1 [Reference]       | 539                   | 1 [Reference]       | 418                    | 1 [Reference]       |
| Never exposed to asbestos and ever exposed to nickel      | 81                 | 84              | 1.26 (0.81, 1.71)  | 31              | 1.18 (0.64, 1.72)   | 19                    | 1.25 (0.5, 2.01)    | 18                     | 2.10 (0.71, 3.48)   |
| Ever exposed to asbestos and never exposed to nickel      | 460                | 415             | 1.11 (0.93, 1.3)   | 159             | 1.00 (0.79, 1.21)   | 99                    | 1.24 (0.89, 1.59)   | 79                     | 1.42 (0.96, 1.89)   |
| Ever exposed to both                                      | 50                 | 67              | 1.38 (0.8, 1.96)   | 19              | 0.91 (0.39, 1.43)   | 18                    | 1.26 (0.43, 2.08)   | 15                     | 2.56 (0.71, 4.41)   |
| <i>p-value multiplicative interaction</i>                 |                    |                 | 0.95               |                 | 0.50                |                       | 0.65                |                        | 0.76                |
| RERI                                                      |                    |                 | 0.01 (-0.74, 0.75) |                 | -0.27 (-1.03, 0.5)  |                       | -0.24 (-1.38, 0.91) |                        | 0.04 (-2.26, 2.34)  |
| <b>Asbestos &amp; PAH</b>                                 |                    |                 |                    |                 |                     |                       |                     |                        |                     |
| Never exposed to both                                     | 8343               | 5537            | 1 [Reference]      | 1477            | 1 [Reference]       | 2201                  | 1 [Reference]       | 893                    | 1 [Reference]       |
| Never exposed to asbestos and ever exposed to PAH         | 478                | 446             | 1.19 (1.0, 1.38)   | 176             | 1.09 (0.86, 1.31)   | 105                   | 1.61 (1.17, 2.05)   | 92                     | 1.75 (1.21, 2.30)   |
| Ever exposed to asbestos and never exposed to PAH         | 352                | 310             | 1.10 (0.90, 1.31)  | 126             | 1.03 (0.78, 1.27)   | 66                    | 1.15 (0.77, 1.54)   | 60                     | 1.51 (0.96, 2.07)   |
| Ever exposed to both                                      | 158                | 172             | 1.31 (0.97, 1.65)  | 52              | 0.92 (0.6, 1.25)    | 51                    | 1.71 (1.02, 2.39)   | 34                     | 2.00 (1.03, 2.98)   |
| <i>p-value multiplicative interaction</i>                 |                    |                 | 0.98               |                 | 0.41                |                       | 0.76                |                        | 0.40                |
| RERI                                                      |                    |                 | 0.02 (-0.41, 0.44) |                 | -0.19 (-0.63, 0.26) |                       | -0.06 (-0.9, 0.78)  |                        | -0.26 (-1.44, 0.92) |
| <b>Asbestos &amp; silica</b>                              |                    |                 |                    |                 |                     |                       |                     |                        |                     |
| Never exposed to both                                     | 3719               | 2617            | 1 [Reference]      | 1167            | 1 [Reference]       | 517                   | 1 [Reference]       | 397                    | 1 [Reference]       |
| Never exposed to asbestos and ever exposed to silica      | 285                | 197             | 1.03 (0.81, 1.26)  | 82              | 1.06 (0.77, 1.35)   | 41                    | 1.05 (0.62, 1.47)   | 39                     | 1.27 (0.69, 1.85)   |
| Ever exposed to asbestos and never exposed to silica      | 447                | 405             | 1.07 (0.89, 1.25)  | 151             | 0.92 (0.72, 1.13)   | 98                    | 1.15 (0.82, 1.48)   | 73                     | 1.26 (0.84, 1.68)   |
| Ever exposed to both                                      | 63                 | 77              | 1.57 (0.97, 2.16)  | 27              | 1.46 (0.75, 2.17)   | 19                    | 1.91 (0.70, 3.12)   | 21                     | 4.32 (1.35, 7.29)   |
| <i>p-value multiplicative interaction</i>                 |                    |                 | 0.13               |                 | 0.19                |                       | 0.24                |                        | 0.02                |
| RERI                                                      |                    |                 | 0.46 (-0.18, 1.1)  |                 | 0.47 (-0.30, 1.24)  |                       | 0.72 (-0.55, 1.99)  |                        | 2.79 (-0.19, 5.76)  |

|                                                         |      |      |                     |      |                     |     |                      |     |                    |
|---------------------------------------------------------|------|------|---------------------|------|---------------------|-----|----------------------|-----|--------------------|
| Chromium-VI & PAH                                       |      |      |                     |      |                     |     |                      |     |                    |
| Never exposed to both                                   | 3830 | 2630 | 1 [Reference]       | 1176 | 1 [Reference]       | 512 | 1 [Reference]        | 393 | 1 [Reference]      |
| Never exposed to chromium-VI and ever exposed to PAH    | 538  | 507  | 1.20 (1.02, 1.39)   | 196  | 1.08 (0.87, 1.29)   | 127 | 1.65 (1.23, 2.07)    | 100 | 1.57 (1.11, 2.04)  |
| Ever exposed to chromium-VI and never exposed to PAH    | 48   | 48   | 1.19 (0.65, 1.73)   | 23   | 1.37 (0.63, 2.12)   | 7   | 0.71 (0.07, 1.35)    | 11  | 1.85 (0.35, 3.35)  |
| Ever exposed to both                                    | 98   | 111  | 1.25 (0.85, 1.65)   | 32   | 0.86 (0.48, 1.24)   | 29  | 1.36 (0.67, 2.06)    | 26  | 2.77 (1.19, 4.36)  |
| <i>p-value multiplicative interaction</i>               |      |      | 0.64                |      | 0.13                |     | 0.78                 |     | 0.93               |
| RERI                                                    |      |      | -0.14 (-0.83, 0.54) |      | -0.60 (-1.45, 0.25) |     | 0.00 (-1.00, 1.00)   |     | 0.35 (-1.82, 2.53) |
| Chromium-VI & silica                                    |      |      |                     |      |                     |     |                      |     |                    |
| Never exposed to both                                   | 4053 | 2894 | 1 [Reference]       | 1273 | 1 [Reference]       | 582 | 1 [Reference]        | 449 | 1 [Reference]      |
| Never exposed to chromium-VI and ever exposed to silica | 315  | 243  | 1.13 (0.90, 1.36)   | 99   | 1.18 (0.88, 1.49)   | 57  | 1.32 (0.84, 1.79)    | 44  | 1.29 (0.72, 1.86)  |
| Ever exposed to chromium-VI and never exposed to silica | 113  | 128  | 1.22 (0.86, 1.58)   | 45   | 1.08 (0.66, 1.49)   | 33  | 1.24 (0.65, 1.84)    | 21  | 1.53 (0.65, 2.42)  |
| Ever exposed to both                                    | 33   | 31   | 1.17 (0.52, 1.83)   | 10   | 0.86 (0.2, 1.53)    | 3   | 0.48 (-0.13, 1.09)   | 16  | 5.80 (1.10, 10.51) |
| <i>p-value multiplicative interaction</i>               |      |      | 0.62                |      | 0.38                |     | 0.06                 |     | 0.05               |
| RERI                                                    |      |      | -0.18 (-0.95, 0.59) |      | -0.40 (-1.22, 0.43) |     | -1.09 (-2.06, -0.11) |     | 3.98 (-0.76, 8.72) |
| Nickel & PAH                                            |      |      |                     |      |                     |     |                      |     |                    |
| Never exposed to both                                   | 3845 | 2638 | 1 [Reference]       | 1181 | 1 [Reference]       | 512 | 1 [Reference]        | 396 | 1 [Reference]      |
| Never exposed to nickel and ever exposed to PAH         | 538  | 507  | 1.21 (1.03, 1.39)   | 196  | 1.09 (0.88, 1.3)    | 126 | 1.66 (1.24, 2.07)    | 101 | 1.59 (1.12, 2.07)  |
| Ever exposed to nickel and never exposed to PAH         | 33   | 40   | 1.57 (0.75, 2.38)   | 18   | 1.76 (0.67, 2.85)   | 7   | 1.05 (0.04, 2.06)    | 8   | 1.84 (0.10, 3.57)  |
| Ever exposed to both                                    | 98   | 111  | 1.24 (0.85, 1.64)   | 32   | 0.86 (0.48, 1.24)   | 30  | 1.40 (0.69, 2.1)     | 25  | 2.56 (1.09, 4.02)  |
| <i>p-value multiplicative interaction</i>               |      |      | 0.18                |      | 0.05                |     | 0.70                 |     | 0.81               |
| RERI                                                    |      |      | -0.53 (-1.45, 0.39) |      | -0.98 (-2.15, 0.18) |     | -0.31 (-1.58, 0.96)  |     | 0.12 (-2.16, 2.40) |
| Nickel & silica                                         |      |      |                     |      |                     |     |                      |     |                    |
| Never exposed to both                                   | 4055 | 2896 | 1 [Reference]       | 1275 | 1 [Reference]       | 582 | 1 [Reference]        | 449 | 1 [Reference]      |
| Never exposed to nickel and ever exposed to silica      | 328  | 249  | 1.11 (0.89, 1.33)   | 102  | 1.16 (0.86, 1.45)   | 56  | 1.24 (0.79, 1.69)    | 48  | 1.41 (0.8, 2.01)   |
| Ever exposed to nickel and never exposed to silica      | 111  | 126  | 1.25 (0.87, 1.62)   | 43   | 1.08 (0.66, 1.50)   | 33  | 1.29 (0.67, 1.91)    | 21  | 1.61 (0.67, 2.55)  |
| Ever exposed to both                                    | 20   | 25   | 1.59 (0.52, 2.66)   | 7    | 1.05 (0.06, 2.04)   | 4   | 0.88 (-0.23, 1.99)   | 12  | 5.86 (0.26, 11.45) |
| <i>p-value multiplicative interaction</i>               |      |      | 0.72                |      | 0.74                |     | 0.39                 |     | 0.11               |
| RERI                                                    |      |      | 0.23 (-0.91, 1.37)  |      | -0.19 (-1.29, 0.92) |     | -0.65 (-1.98, 0.68)  |     | 3.84 (-1.81, 9.48) |
| PAH & silica                                            |      |      |                     |      |                     |     |                      |     |                    |
| Never exposed to both                                   | 3587 | 2480 | 1 [Reference]       | 1113 | 1 [Reference]       | 480 | 1 [Reference]        | 368 | 1 [Reference]      |
| Never exposed to PAH and ever exposed to silica         | 291  | 198  | 1.03 (0.80, 1.25)   | 86   | 1.10 (0.80, 1.4)    | 39  | 1.04 (0.62, 1.47)    | 36  | 1.19 (0.63, 1.76)  |
| Ever exposed to PAH and never exposed to silica         | 579  | 542  | 1.15 (0.98, 1.33)   | 205  | 1.02 (0.82, 1.21)   | 135 | 1.53 (1.15, 1.91)    | 102 | 1.48 (1.05, 1.91)  |
| Ever exposed to both                                    | 57   | 76   | 1.76 (1.07, 2.45)   | 23   | 1.39 (0.66, 2.12)   | 21  | 2.40 (0.88, 3.91)    | 24  | 5.12 (1.77, 8.48)  |

|                                           |  |  |                    |  |                    |  |                    |  |                  |
|-------------------------------------------|--|--|--------------------|--|--------------------|--|--------------------|--|------------------|
| <i>p-value multiplicative interaction</i> |  |  | 0.09               |  | 0.48               |  | 0.30               |  | 0.01             |
| RERI                                      |  |  | 0.58 (-0.14, 1.30) |  | 0.27 (-0.52, 1.06) |  | 0.82 (-0.75, 2.39) |  | 3.45 (0.10, 6.8) |

ORs were adjusted for study centre, age group (category), smoking pack-years (current and former smokers: <10, 10-19, and ≥ 20 pack-years, never-smokers) and time since quitting smoking (current smokers; former smokers: <7, 8–15, 16–25, and ≥ 26 years; never-smokers).

Table S3. Risk of lung cancer (OR), relative excess risk due to interaction (RERI), and test for multiplicative interaction (P-value) associated with single and pairwise combinations of occupational exposure to asbestos, chromium VI, nickel, PAH, and silica in male workers in SYNERGY by smoking status (never, former, and current cigarette smokers)

| Combinations of occupational exposures in men             | Never Smokers          |                |                     | Former Smokers         |                 |                     | Current Smokers*       |                 |                     |
|-----------------------------------------------------------|------------------------|----------------|---------------------|------------------------|-----------------|---------------------|------------------------|-----------------|---------------------|
|                                                           | Control<br>s<br>N=4437 | Cases<br>N=490 | OR (95% CI)         | Control<br>s<br>N=7328 | Cases<br>N=4787 | OR (95% CI)         | Control<br>s<br>N=4686 | Cases<br>N=8328 | OR (95% CI)         |
| <b>Asbestos &amp; chromium-VI</b>                         |                        |                |                     |                        |                 |                     |                        |                 |                     |
| Never exposed to both                                     | 2517                   | 240            |                     | 3502                   | 1857            |                     | 2103                   | 3024            |                     |
| Ever exposed to asbestos and never exposed to chromium-VI | 1075                   | 134            | 1.38 (1.06, 1.7)    | 2038                   | 1533            | 1.38 (1.25, 1.51)   | 1396                   | 2686            | 1.25 (1.14, 1.37)   |
| Never exposed to asbestos and ever exposed to chromium-VI | 374                    | 45             | 1.34 (0.88, 1.8)    | 691                    | 508             | 1.29 (1.11, 1.46)   | 462                    | 973             | 1.39 (1.20, 1.57)   |
| Ever exposed to both                                      | 471                    | 71             | 1.81 (1.28, 2.34)   | 1097                   | 889             | 1.46 (1.29, 1.63)   | 725                    | 1645            | 1.42 (1.26, 1.58)   |
| <i>p-value multiplicative interaction</i>                 |                        |                | 0.92                |                        |                 | 0.04                |                        |                 | 0.02                |
| <i>RERI</i>                                               |                        |                | 0.09 (-0.60, 0.77)  |                        |                 | -0.20 (-0.45, 0.04) |                        |                 | -0.22 (-0.45, 0.02) |
| <b>Asbestos &amp; nickel</b>                              |                        |                |                     |                        |                 |                     |                        |                 |                     |
| Never exposed to both                                     | 2611                   | 258            |                     | 3686                   | 2007            |                     | 2210                   | 3311            |                     |
| Ever exposed to asbestos and never exposed to nickel      | 1124                   | 144            | 1.37 (1.06, 1.67)   | 2181                   | 1684            | 1.39 (1.26, 1.51)   | 1499                   | 2985            | 1.24 (1.13, 1.35)   |
| Never exposed to asbestos and ever exposed to nickel      | 280                    | 27             | 1.08 (0.62, 1.53)   | 507                    | 358             | 1.27 (1.07, 1.47)   | 355                    | 686             | 1.24 (1.06, 1.43)   |
| Ever exposed to both                                      | 422                    | 61             | 1.68 (1.16, 2.20)   | 954                    | 738             | 1.39 (1.22, 1.55)   | 622                    | 1346            | 1.32 (1.17, 1.48)   |
| <i>p-value multiplicative interaction</i>                 |                        |                | 0.63                |                        |                 | 0.02                |                        |                 | 0.11                |
| <i>RERI</i>                                               |                        |                | 0.23 (-0.45, 0.91)  |                        |                 | -0.27 (-0.53, 0.00) |                        |                 | -0.16 (-0.40, 0.08) |
| <b>Asbestos &amp; PAH</b>                                 |                        |                |                     |                        |                 |                     |                        |                 |                     |
| Never exposed to both                                     | 2598                   | 250            |                     | 3596                   | 1996            |                     | 2149                   | 3291            |                     |
| Ever exposed to asbestos and never exposed to PAH         | 949                    | 129            | 1.48 (1.13, 1.82)   | 1828                   | 1423            | 1.36 (1.22, 1.49)   | 1254                   | 2495            | 1.21 (1.09, 1.32)   |
| Never exposed to asbestos and ever exposed to PAH         | 293                    | 35             | 1.25 (0.77, 1.72)   | 597                    | 369             | 1.02 (0.86, 1.17)   | 416                    | 706             | 1.05 (0.90, 1.19)   |
| Ever exposed to both                                      | 597                    | 76             | 1.47 (1.06, 1.89)   | 1307                   | 999             | 1.33 (1.18, 1.47)   | 867                    | 1836            | 1.26 (1.13, 1.40)   |
| <i>p-value multiplicative interaction</i>                 |                        |                | 0.37                |                        |                 | 0.68                |                        |                 | 1.00                |
| <i>RERI</i>                                               |                        |                | -0.25 (-0.91, 0.40) |                        |                 | -0.05 (-0.27, 0.17) |                        |                 | 0.01 (-0.19, 0.21)  |
| <b>Asbestos &amp; silica</b>                              |                        |                |                     |                        |                 |                     |                        |                 |                     |
| Never exposed to both                                     | 2412                   | 229            |                     | 3414                   | 1750            |                     | 2145                   | 3071            |                     |
| Ever exposed to asbestos and never exposed to silica      | 1053                   | 129            | 1.41 (1.08, 1.74)   | 1938                   | 1327            | 1.31 (1.18, 1.44)   | 1349                   | 2450            | 1.21 (1.10, 1.32)   |
| Never exposed to asbestos and ever exposed to silica      | 479                    | 56             | 1.34 (0.91, 1.76)   | 779                    | 615             | 1.34 (1.16, 1.51)   | 420                    | 926             | 1.38 (1.19, 1.56)   |
| Ever exposed to both                                      | 493                    | 76             | 1.77 (1.25, 2.29)   | 1197                   | 1095            | 1.64 (1.45, 1.82)   | 772                    | 1881            | 1.46 (1.30, 1.62)   |





|                                                 |      |     |                     |      |      |                    |      |      |                     |
|-------------------------------------------------|------|-----|---------------------|------|------|--------------------|------|------|---------------------|
| Never exposed to both                           | 2815 | 278 |                     | 4056 | 2253 |                    | 2597 | 3924 |                     |
| Ever exposed to PAH and never exposed to silica | 650  | 80  | 1.34 (0.98,1.7)     | 1296 | 824  | 1.05 (0.94,1.17)   | 897  | 1597 | 1.12 (1.01, 1.23)   |
| Never exposed to PAH and ever exposed to silica | 732  | 101 | 1.48 (1.10, 1.86)   | 1368 | 1166 | 1.33 (1.19, 1.47)  | 806  | 1862 | 1.35 (1.21, 1.49)   |
| Ever exposed to both                            | 240  | 31  | 1.41 (0.84,1.98)    | 608  | 544  | 1.47 (1.27, 1.68)  | 386  | 945  | 1.38 (1.19, 1.57)   |
| <i>p-value multiplicative interaction</i>       |      |     | 0.19                |      |      | 0.58               |      |      | 0.33                |
| RERI                                            |      |     | -0.41 (-1.13, 0.31) |      |      | 0.09 (-0.15, 0.34) |      |      | -0.09 (-0.32, 0.15) |

All models were adjusted for study centre and age group (category). For current smokers, models were also adjusted for smoking pack-years (log[ cPY+1]). For former smokers, models were also adjusted for smoking pack-years and time since quitting smoking ( <7, 8–15, 16–25, and ≥ 26 years).

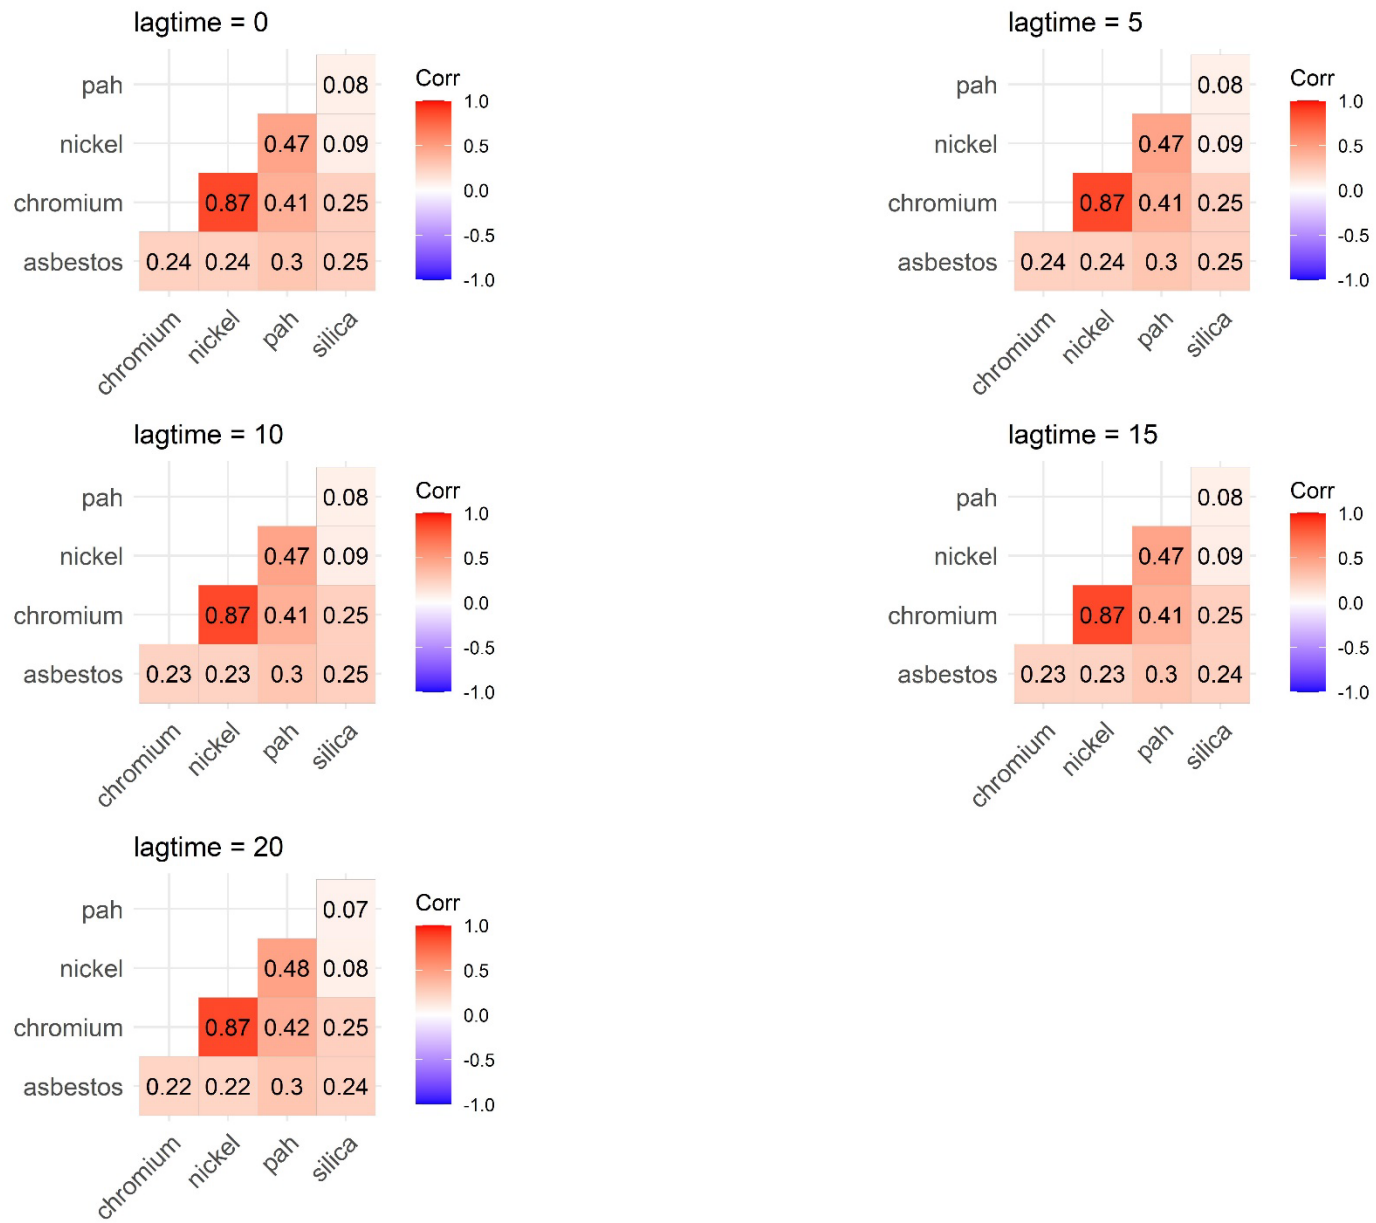

Figure S1. Heatmaps of Cramer's V statistics (Corr) between the never/ever occupational exposures by lag time in years
